# Supplementary material
Source: PubMed Central journal article supplement (PMC6248335)
Supplement: NIHMS1511533-supplement-1.pdf [file NIHMS1511533-supplement-1.pdf]

Cell Reports, Volume 25

## Supplemental Information

### **Microtubule Acetylation Is Required for Mechanosensation in *Drosophila***

**Connie Yan, Fei Wang, Yun Peng, Claire R. Williams, Brian Jenkins, Jill Wildonger, Hyeon-Jin Kim, Jonathan B. Perr, Joshua C. Vaughan, Megan E. Kern, Michael R. Falvo, E. Timothy O'Brien III, Richard Superfine, John C. Tuthill, Yang Xiang, Stephen L. Rogers, and Jay Z. Parrish**

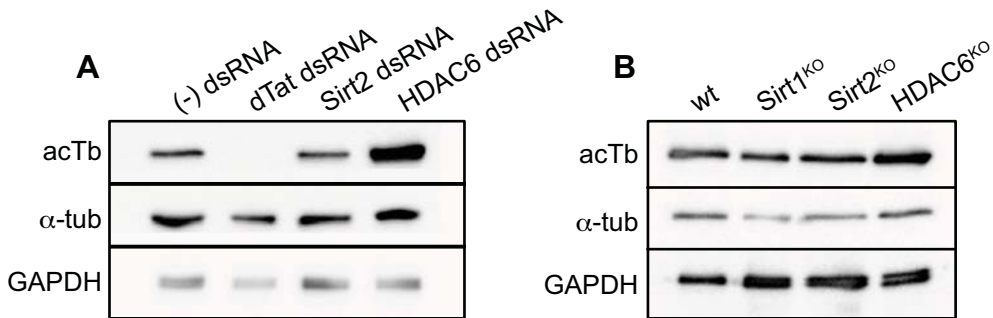

**Figure S1. Related to Figure 1.** HDAC6 is the major alpha tubulin deacetylase in *Drosophila*. (A) Western blots of cell lysates from S2 cells treated with dsRNA to the indicated genes showing that *HDAC6* RNAi leads to increased levels of acTb. (B) Western blots of larval lysates from the indicated genotypes showing that loss of *HDAC6* function leads to increased accumulation of acTb *in vivo*.

**A**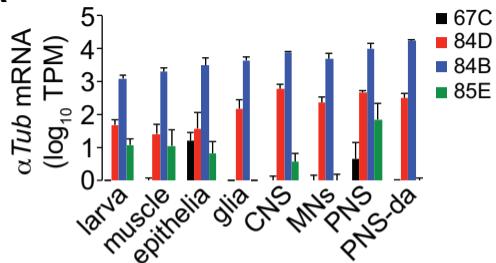**B**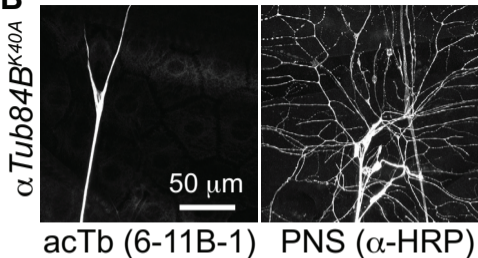

**Figure S2. Related to Figure 3.**  $\alpha$ Tubulin K40 is required for tubulin acetylation. (A) Larval mRNA expression of the *Drosophila*  $\alpha$ Tubulin isoforms in the indicated cell types;  $\alpha$ Tub84B accounts for >90% of  $\alpha$ Tubulin mRNA in the PNS. (B) acTb staining in  $\alpha$ Tub84B<sup>K40A</sup> mutant third instar larva showing that the  $\alpha$ Tub84B isoform accounts for the majority of acTb in larvae.

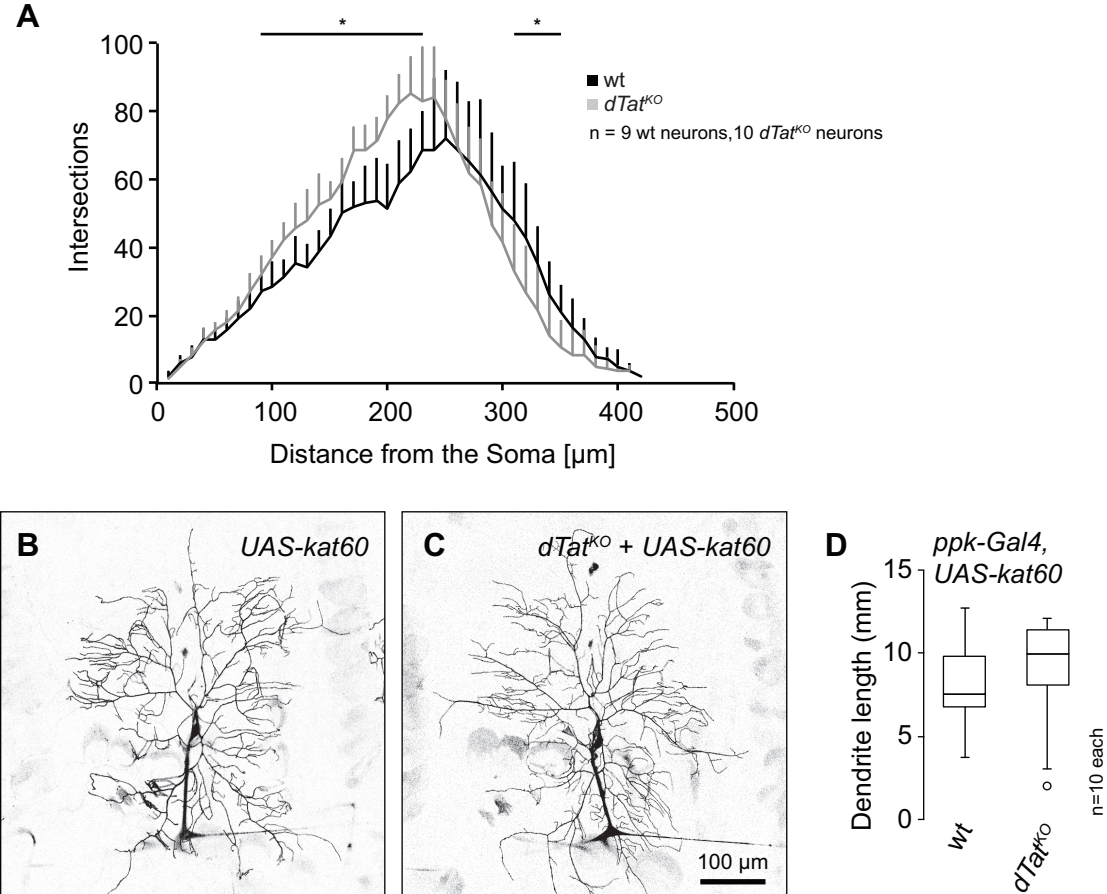

**Figure S3. Related to Figure 4.** (A) *dTat* has a minor effect on dendrite branch distribution. Sholl analysis depicting mean number and standard deviation of dendrite intersections as a function of distance from soma for 9 wt C4da neurons and 10  $dTat^{KO}$  mutant C4da neurons. \* $P < 0.05$  compared to wt controls, Welch's t-test. (B-D) *dTat* has no effect on *katanin*-induced remodeling of c4da dendrite arbors. Representative images of control larvae (B) or  $dTat^{KO}$  mutant larvae (C) overexpressing *katanin* (*UAS-kat60*) in c4da neurons under the control of *ppk-Gal4*. Dendrites were labeled with the c4da-specific marker *ppk-CD4-tdTomato* visualized via live confocal imaging. (D) Quantification of total dendrite length for the indicated genotypes. Boxes mark 1st and 3rd quartiles, bands mark medians, whiskers mark 1.5 x IQR, and outliers are shown as points. Welch's test of unequal variance revealed no significant difference was detected between the two groups.

**A. Raw images from Figure 7D-G**

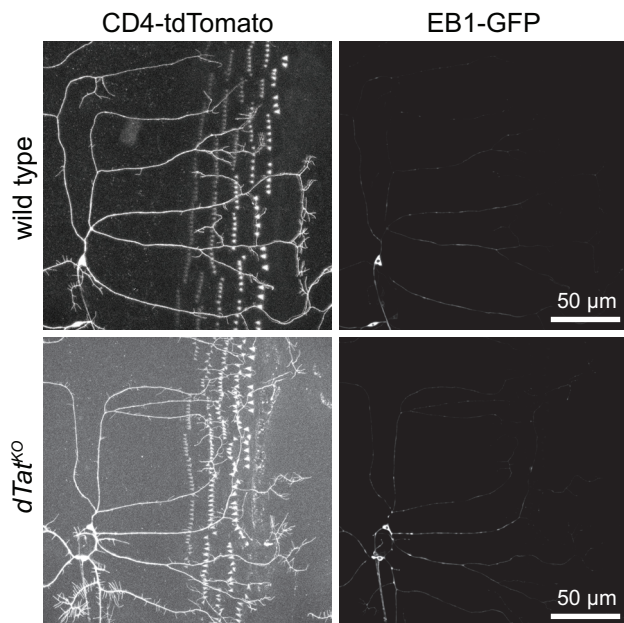

**B. Raw images from Figure 7I-K**

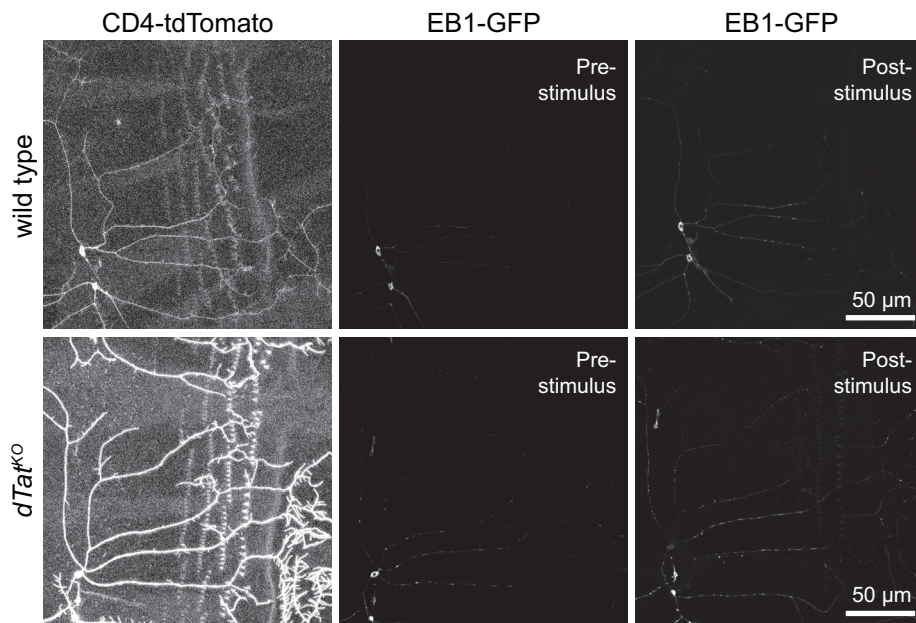

**Figure S4. Related to Figure 7.** Raw images of c3da neurons expressing EB1-GFP to label microtubule plus ends and the membrane marker CD4-tdTomato from (A) untreated wild type or *dTat*<sup>KO</sup> mutant larvae and (B) wild type and *dTat*<sup>KO</sup> mutant larvae that were subjected to mechanical stimulus.

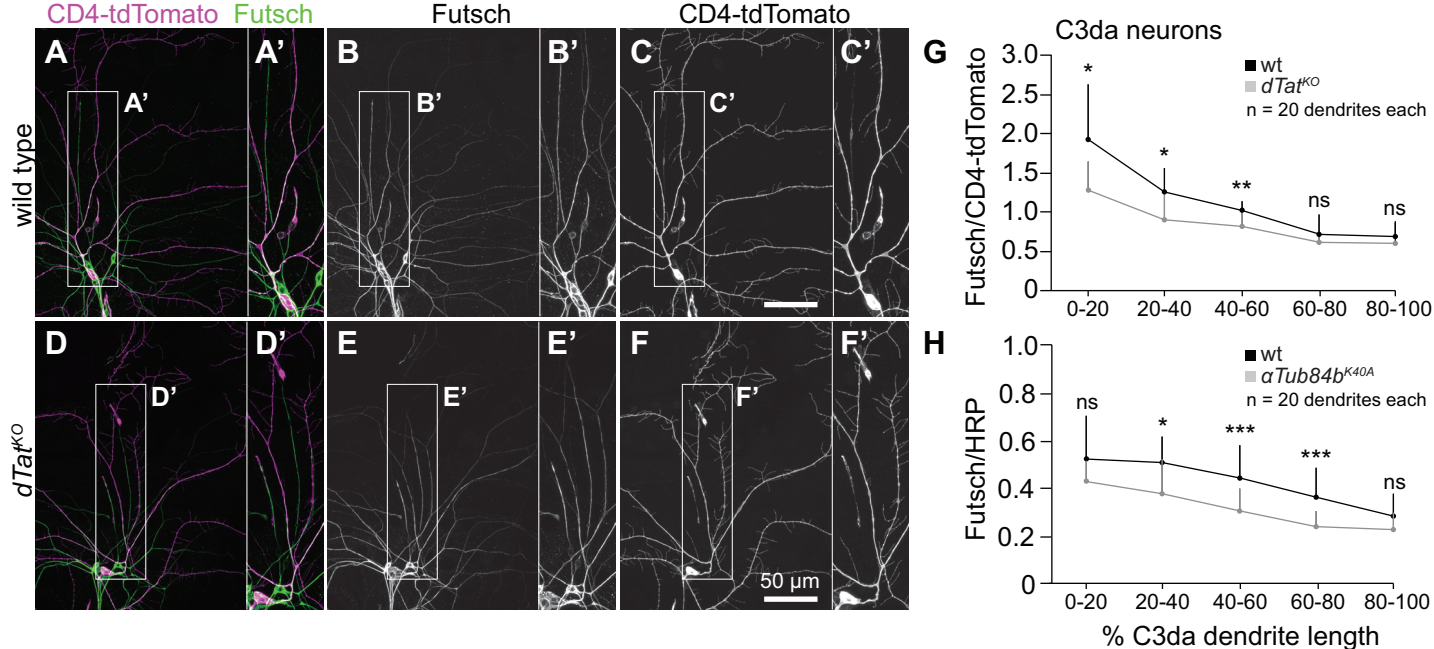

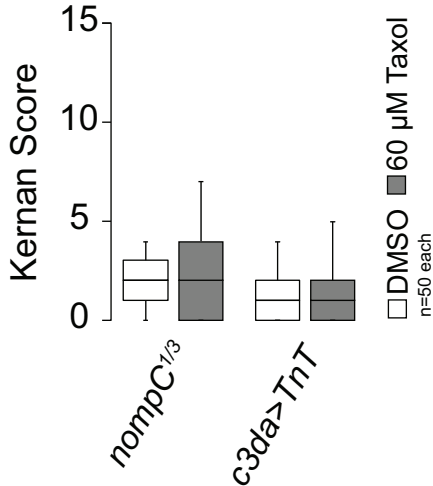

**Figure S6. Related to Figure 7.** Taxol enhancement of gentle touch responses depends on activity of NOMPC and *c3da* neurons. Boxplots depict behavioral responses of third instar larvae of the indicated genotypes to gentle touch stimulus at 96 h after egg laying (AEL). Mutation of *nompC* or blocking synaptic transmission by expressing Tetanus toxin in *c3da* neurons (*c3da>TnT*) rendered taxol-fed larvae insensitive to gentle touch.

**A****Overall Elastic Moduli Comparison**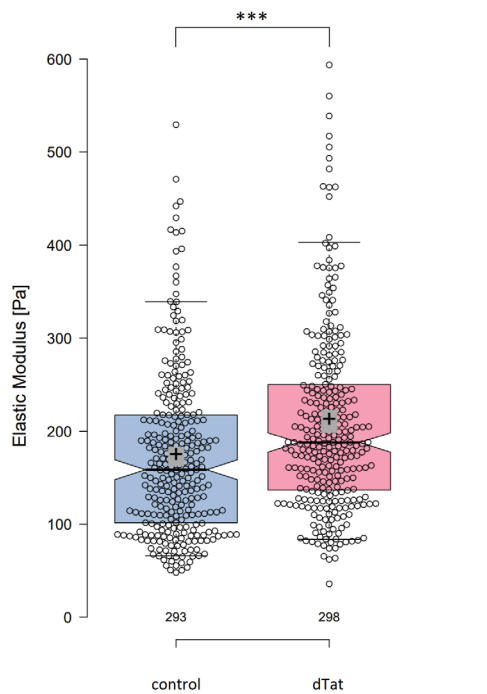**B****Pair-wise Elastic Moduli Comparison**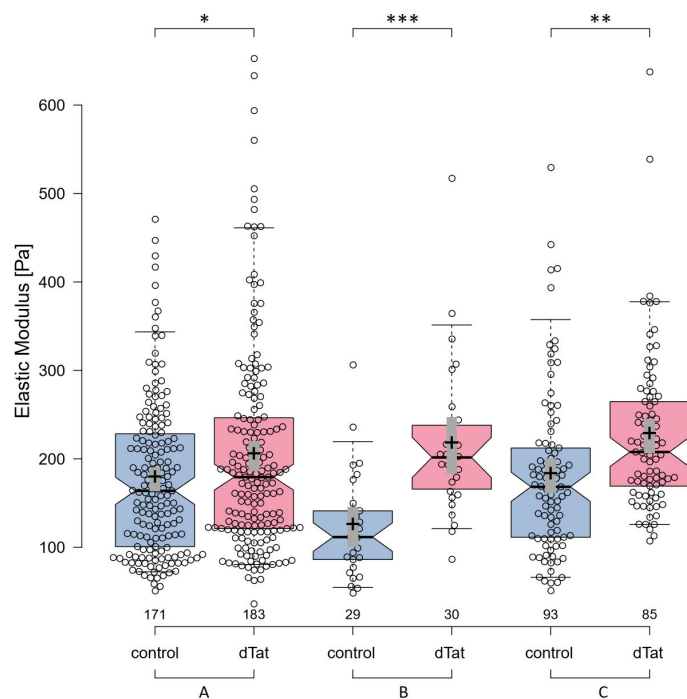**C****Force vs. Indentation Curve**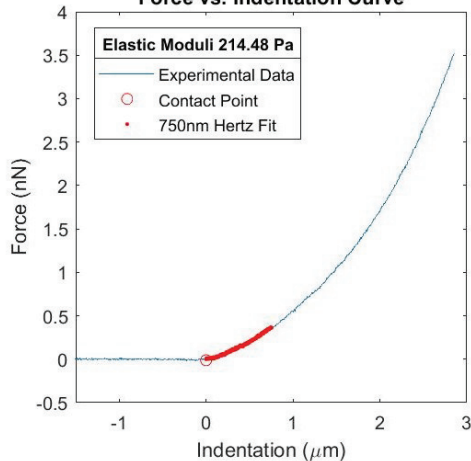

**Figure S7. Related to Figure 7.** dTAT regulates cellular rigidity in S2 cells. (A) Plots show the pattern of stiffness data for a combined 3 days of experiments, with the median (central bar) and mean (+ sign) shown. Means of 172 Pa for control and 211 Pa for *dTat* RNAi are significantly different to  $p < 0.0001$ . The medians of each were control: 158.5 Pa; *dTat* RNAi: 187.9 Pa, and the Mann Whitney comparison was also significant  $> 0.0001$ . (B) The paired comparisons of the cellular stiffness data shown in (A). The waist of the boxplots indicates the median and the height of the notches represents the 95% confidence interval of the median. The mean is denoted by the plus sign and the grey box represents the 95% confidence interval of the mean. The whiskers extend from the 5th to the 95th percentile. Statistical significance is marked as follows: “\*\*\*” for a p-value  $< 0.001$ , “\*\*” for a p-value between 0.001 and 0.005, and “\*” for a p-value  $< 0.05$ . Significance levels for each pair, based on the student’s t-test, assuming unequal variance, are indicated in Table S2. Each pair was derived from cells separately grown and maintained; no wells were re-used. (C) Characteristic Force vs. Indentation curve fit to the Hertz model. The plot shows the entire force-indentation curve in blue, a red circle for the contact point, and the Hertz model fit for 750 nm indent in red. Within the Hertz model, force increases as the  $3/2$  power of indentation. Here this fitting resulted in a cell modulus of 214 Pa.



| <b>Table S1. Related to Figure 5.</b> Expression levels of mechanosensory channels in different cell types. |        |            |             |
|-------------------------------------------------------------------------------------------------------------|--------|------------|-------------|
|                                                                                                             | PNS    | da neurons | motoneurons |
| <i>CG46121</i>                                                                                              | 56.91  | 7.10       | 0           |
| <i>iav</i>                                                                                                  | 3.26   | 0          | 4.59        |
| <i>nan</i>                                                                                                  | 0      | 0.02       | 0.19        |
| <i>nompC</i>                                                                                                | 87.84  | 22.92      | 0           |
| <i>pain</i>                                                                                                 | 6.23   | 4.08       | 0.51        |
| <i>Piezo</i>                                                                                                | 16.93  | 100.48     | 4.00        |
| <i>ppk</i>                                                                                                  | 272.00 | 398.80     | 0           |
| <i>ppk26</i>                                                                                                | 628.29 | 650.44     | 0           |
| <i>rpk</i>                                                                                                  | 0      | 0          | 0           |
| <i>trp</i>                                                                                                  | 0      | 0          | 0           |
| <i>Trpgamma</i>                                                                                             | 0      | 0          | 0.02        |
| <i>trpl</i>                                                                                                 | 20.83  | 0.03       | 0           |
| <i>wtrw</i>                                                                                                 | 0.25   | 0          | 0           |

Mean mRNA expression levels (tpm, transcripts per million) are shown for mechanosensory channel genes in each of the indicated cell types. N = 4 independent samples for PNS and da neurons; 7 independent samples for motoneurons.

**Table S2. Related to STAR Methods.** Means, medians and significance values for AFM measurements.

|                      | Pair A |       | Pair B   |       | Pair C   |       |
|----------------------|--------|-------|----------|-------|----------|-------|
| <b>Mean [Pa]</b>     | 176.8  | 203.0 | 123.2    | 215.3 | 180.7    | 226.1 |
| <b>Median [Pa]</b>   | 163.8  | 179.3 | 111.5    | 201.6 | 168.4    | 207.7 |
| <b>p (same mean)</b> | 0.016  |       | 1.08E-05 |       | 9.88E-04 |       |
|                      | *      |       | ***      |       | **       |       |

Significance levels for each pair were calculated with the Student's t-test assuming unequal variance. Statistical significance is marked as follows: “\*\*\*\*” for a p-value < 0.001, “\*\*\*” for a p-value between 0.001 and 0.005, and “\*” for a p-value < 0.05.

| <b>Table S3. Related to Figures 1-7. Experimental genotypes used in this study.</b> |                                                                                                                                                       |
|-------------------------------------------------------------------------------------|-------------------------------------------------------------------------------------------------------------------------------------------------------|
| <b>Figure 1E</b>                                                                    |                                                                                                                                                       |
| <i>wt</i>                                                                           | <i>w</i> <sup>1118</sup>                                                                                                                              |
| <i>dTat</i> <sup>KO</sup>                                                           | <i>w</i> <sup>1118</sup> ; +; <i>dTat</i> <sup>KO</sup> / <i>dTat</i> <sup>KO</sup>                                                                   |
| <b>Figure 2A</b>                                                                    |                                                                                                                                                       |
| Larva                                                                               | <i>w</i> <sup>1118</sup>                                                                                                                              |
| Muscle                                                                              | <i>w</i> <sup>1118</sup> ; <i>MHC-Gal4</i> / <i>UAS-nls-GFP</i>                                                                                       |
| Epi.                                                                                | <i>w</i> <sup>1118</sup> ; <i>UAS-nls-GFP</i> / + ; <i>A58-Gal4</i> / +                                                                               |
| Glia                                                                                | <i>w</i> <sup>1118</sup> ; <i>UAS-nls-GFP</i> / + ; <i>repo-Gal4</i> / +                                                                              |
| CNS                                                                                 | <i>w</i> <sup>1118</sup> ; <i>elav-Gal4</i> / + ; <i>UAS-nls-GFP</i> / +                                                                              |
| MNs                                                                                 | <i>w</i> <sup>1118</sup> ; <i>UAS-nls-GFP</i> / + ; <i>Vglut-Gal4</i> / +                                                                             |
| PNS                                                                                 | <i>w</i> <sup>1118</sup> ; <i>elav-Gal4</i> / + ; <i>UAS-nls-GFP</i> / +                                                                              |
| PNS-da                                                                              | <i>w</i> <sup>1118</sup> ; <i>21-7-Gal4</i> / <i>UAS-nls-GFP</i>                                                                                      |
| <b>Figure 2B-2C</b>                                                                 |                                                                                                                                                       |
| wild type                                                                           | <i>w</i> <sup>1118</sup>                                                                                                                              |
| <b>Figure 2D-2G</b>                                                                 |                                                                                                                                                       |
| <i>dTat</i> <sup>GFP</sup>                                                          | <i>w</i> <sup>1118</sup> ; +; <i>dTat</i> <sup>GFP</sup> / <i>dTat</i> <sup>GFP</sup>                                                                 |
| <b>Figure 2H-2K</b>                                                                 |                                                                                                                                                       |
| wild type                                                                           | <i>w</i> <sup>1118</sup>                                                                                                                              |
| <i>dTat</i> <sup>KO</sup>                                                           | <i>w</i> <sup>1118</sup> ; +; <i>dTat</i> <sup>KO</sup> / <i>dTat</i> <sup>KO</sup>                                                                   |
| <b>Figure 2L-2O</b>                                                                 |                                                                                                                                                       |
| <i>dTat</i> <sup>KO</sup> + 19-12> <i>GFP-dTat</i>                                  | <i>w</i> <sup>1118</sup> ; <i>UAS-GFP-dTat-L</i> / +; <i>19-12-Gal4</i> , <i>dTat</i> <sup>KO</sup> / <i>dTat</i> <sup>KO</sup>                       |
| <b>Figure 3A</b>                                                                    |                                                                                                                                                       |
| <i>wt</i>                                                                           | <i>w</i> <sup>1118</sup>                                                                                                                              |
| <i>dTat</i> <sup>KO</sup>                                                           | <i>w</i> <sup>1118</sup> ; +; <i>dTat</i> <sup>KO</sup> / <i>dTat</i> <sup>KO</sup>                                                                   |
| <i>dTat</i> <sup>KO</sup> / <i>Df</i>                                               | <i>w</i> <sup>1118</sup> ; +; <i>dTat</i> <sup>KO</sup> / <i>Df(3L)BSC113</i>                                                                         |
| <i>αTub84B</i> <sup>K40A</sup>                                                      | <i>w</i> <sup>1118</sup> ; +; <i>αTub84B</i> <sup>K40A</sup> / <i>αTub84B</i> <sup>KO</sup>                                                           |
| <i>αTub84B</i> <sup>K40R</sup>                                                      | <i>w</i> <sup>1118</sup> ; +; <i>αTub84B</i> <sup>K40R</sup> / <i>αTub84B</i> <sup>KO</sup>                                                           |
| <i>dTat</i> <sup>KO</sup> , <i>αTub84B</i> <sup>K40A</sup>                          | <i>w</i> <sup>1118</sup> ; +; <i>dTat</i> <sup>KO</sup> , <i>αTub84B</i> <sup>K40A</sup> / <i>dTat</i> <sup>KO</sup> , <i>αTub84B</i> <sup>K40A</sup> |
| <b>Figure 3B</b>                                                                    |                                                                                                                                                       |
| <i>c3da-Gal4</i> / +                                                                | <i>w</i> <sup>1118</sup> ; <i>nompC-Gal4</i> / +                                                                                                      |
| <i>UAS-dTat</i> / +                                                                 | <i>w</i> <sup>1118</sup> ; <i>UAS-GFP-dTat-L</i> / +                                                                                                  |
| <i>dTat</i> <sup>KO</sup> + <i>c3da&gt;dTat</i>                                     | <i>w</i> <sup>1118</sup> ; <i>nompC-Gal4</i> / <i>UAS-GFP-dTat-L</i> ; <i>dTat</i> <sup>KO</sup> / <i>dTat</i> <sup>KO</sup>                          |
| <i>c3da&gt;dTat</i>                                                                 | <i>w</i> <sup>1118</sup> ; <i>nompC-Gal4</i> / <i>UAS-GFP-dTat-L</i>                                                                                  |
| <i>HDAC6</i> <sup>KO</sup>                                                          | <i>y</i> <sup>1</sup> , <i>w</i> <sup>1118</sup> , <i>HDAC6</i> <sup>KO</sup>                                                                         |
| <i>αTub84B</i> <sup>K40R</sup> + <i>c3da&gt;dTat</i>                                | <i>w</i> <sup>1118</sup> ; <i>nompC-Gal4</i> / <i>UAS-GFP-dTat-L</i> ; <i>αTub84B</i> <sup>K40R</sup> / <i>αTub84B</i> <sup>K40R</sup>                |
| <b>Figure 3C</b>                                                                    |                                                                                                                                                       |
| <i>wt</i>                                                                           | <i>w</i> <sup>1118</sup>                                                                                                                              |
| <i>dTat</i> <sup>KO</sup>                                                           | <i>w</i> <sup>1118</sup> ; +; <i>dTat</i> <sup>KO</sup> / <i>dTat</i> <sup>KO</sup>                                                                   |
| <b>Figure 3D</b>                                                                    |                                                                                                                                                       |
| <i>wt</i>                                                                           | <i>w</i> <sup>1118</sup>                                                                                                                              |
| <i>c4da&gt;Kir</i>                                                                  | <i>w</i> <sup>1118</sup> ; +; <i>ppk-Gal4</i> / <i>UAS-KIR2.1</i>                                                                                     |
| <i>dTat</i> <sup>KO</sup>                                                           | <i>w</i> <sup>1118</sup> ; +; <i>dTat</i> <sup>KO</sup> / <i>dTat</i> <sup>KO</sup>                                                                   |

|                                        |                                                                                                                        |
|----------------------------------------|------------------------------------------------------------------------------------------------------------------------|
| $\alpha\text{Tub84B}^{K40A}$           | $w^{1118}; +; \alpha\text{Tub84B}^{K40A} / \alpha\text{Tub84B}^{KO}$                                                   |
| $d\text{Tat}^{KO} + c4da>d\text{Tat}$  | $w^{1118}; \text{UAS-GFP-dTat-L} / +; \text{ppk-Gal4}, d\text{Tat}^{KO} / d\text{Tat}^{KO}$                            |
| <b>Figure 3E-3F</b>                    |                                                                                                                        |
| <i>wt</i>                              | $w^{1118}$                                                                                                             |
| $d\text{Tat}^{KO}$                     | $w^{1118}; +; d\text{Tat}^{KO} / d\text{Tat}^{KO}$                                                                     |
| $\alpha\text{Tub84B}^{K40A}$           | $w^{1118}; +; \alpha\text{Tub84B}^{K40A} / \alpha\text{Tub84B}^{KO}$                                                   |
| $d\text{Tat}^{KO} + cho>d\text{Tat}$   | $w^{1118}; \text{UAS-GFP-dTat-L} / \text{nompC-Gal4}; d\text{Tat}^{KO} / d\text{Tat}^{KO}$                             |
| <b>Figure 3G</b>                       |                                                                                                                        |
| <i>wt</i>                              | $w^{1118}$                                                                                                             |
| $c4da>Kir$                             | $w^{1118}; +; \text{ppk-Gal4} / \text{UAS-KIR2.1}$                                                                     |
| $d\text{Tat}^{KO}$                     | $w^{1118}; +; d\text{Tat}^{KO} / d\text{Tat}^{KO}$                                                                     |
| $\alpha\text{Tub84B}^{K40A}$           | $w^{1118}; +; \alpha\text{Tub84B}^{K40A} / \alpha\text{Tub84B}^{KO}$                                                   |
| <b>Figure 3H</b>                       |                                                                                                                        |
| <i>wt</i>                              | $w^{1118}$                                                                                                             |
| $d\text{Tat}^{KO}$                     | $w^{1118}; +; d\text{Tat}^{KO} / d\text{Tat}^{KO}$                                                                     |
| $\alpha\text{Tub84B}^{K40A}$           | $w^{1118}; +; \alpha\text{Tub84B}^{K40A} / \alpha\text{Tub84B}^{KO}$                                                   |
| <b>Figure 4A-4D</b>                    |                                                                                                                        |
| <i>wild type</i>                       | $w^{1118}; \text{nompC-Gal4}, \text{UAS-CD4-tdGFP} / +$                                                                |
| $d\text{Tat}^{KO}$                     | $w^{1118}; \text{nompC-Gal4}, \text{UAS-CD4-tdGFP} / +; d\text{Tat}^{KO} / d\text{Tat}^{KO}$                           |
| <b>Figure 4E-4G</b>                    |                                                                                                                        |
| <i>wt</i>                              | $w^{1118}$                                                                                                             |
| $d\text{Tat}^{KO}$                     | $w^{1118}; +; d\text{Tat}^{KO} / d\text{Tat}^{KO}$                                                                     |
| <b>Figure 4H-4L</b>                    |                                                                                                                        |
| <i>wild type</i>                       | $w^{1118}, \text{ppk-mCD8-GFP}$                                                                                        |
| $d\text{Tat}^{KO}$                     | $w^{1118}, \text{ppk-mCD8-GFP}; +; d\text{Tat}^{KO} / d\text{Tat}^{KO}$                                                |
| <b>Figure 5A-5C</b>                    |                                                                                                                        |
| <i>wt</i>                              | $w^{1118}; \text{nompC-Gal4} / \text{UAS-GCaMP6s}$                                                                     |
| $d\text{Tat}^{KO}$                     | $w^{1118}; \text{nompC-Gal4} / \text{UAS-GCaMP6s}; d\text{Tat}^{KO} / d\text{Tat}^{KO}$                                |
| $\alpha\text{Tub84B}^{K40A}$           | $w^{1118}; \text{nompC-Gal4} / \text{UAS-GCaMP6s}; \alpha\text{Tub84B}^{K40A} / \alpha\text{Tub84B}^{K40A}$            |
| <b>Figure 5D</b>                       |                                                                                                                        |
| $d\text{Tat}^{KO}$                     | $w^{1118}; +; d\text{Tat}^{KO} / d\text{Tat}^{KO}$                                                                     |
| $\text{nompC}^{1/3}$                   | $w^{1118}; \text{nompC}^1 / \text{nompC}^3$                                                                            |
| $c3da>TnT$                             | $w^{1118}; \text{nompC-Gal4} / \text{UAS-Tetanus Toxin}$                                                               |
| $\text{nompC}^{1/3}; d\text{Tat}^{KO}$ | $w^{1118}; \text{nompC}^1 / \text{nompC}^3; d\text{Tat}^{KO} / d\text{Tat}^{KO}$                                       |
| <b>Figure 5F-5G</b>                    |                                                                                                                        |
| $Vglut>GFP$                            | $w^{1118}; \text{OK377-Gal4}, \text{UAS-mCD8-GFP} / +$                                                                 |
| $Vglut>\text{nompC}$                   | $w^{1118}, \text{UAS-GFP-nompC}; \text{OK377-Gal4}, \text{UAS-mCD8-GFP} / +$                                           |
| $Vglut>\text{nompC}; d\text{Tat}^{KO}$ | $w^{1118}, \text{UAS-GFP-nompC}; \text{OK377-Gal4}, \text{UAS-mCD8-GFP} / +; d\text{Tat}^{KO} / d\text{Tat}^{KO}$      |
| <b>Figure 6A</b>                       |                                                                                                                        |
| <i>wild type</i>                       | $w^{1118}, \text{UAS-GFP-nompC}; \text{nompC-Gal4}, \text{UAS-mCD4-tdTomato} / +$                                      |
| $d\text{Tat}^{KO}$                     | $w^{1118}, \text{UAS-GFP-nompC}; \text{nompC-Gal4}, \text{UAS-mCD4-tdTomato} / +; d\text{Tat}^{KO} / d\text{Tat}^{KO}$ |
| <b>Figure 7A-7H</b>                    |                                                                                                                        |

|                                        |                                                                                                                               |
|----------------------------------------|-------------------------------------------------------------------------------------------------------------------------------|
| <i>wild type</i>                       | <i>w</i> <sup>1118</sup> ; <i>nompC-Gal4, UAS-mCD4-tdTomato / UAS-EB1-GFP</i>                                                 |
| <i>dTat</i> <sup>KO</sup>              | <i>w</i> <sup>1118</sup> ; <i>nompC-Gal4, UAS-mCD4-tdTomato / UAS-EB1-GFP; dTat</i> <sup>KO</sup> / <i>dTat</i> <sup>KO</sup> |
| <b>Figure 7I</b>                       |                                                                                                                               |
| <i>wild type</i>                       | <i>w</i> <sup>1118</sup>                                                                                                      |
| <b>Figure 7J-7M</b>                    |                                                                                                                               |
| <i>wt</i>                              | <i>w</i> <sup>1118</sup>                                                                                                      |
| <i>dTat</i> <sup>KO</sup>              | <i>w</i> <sup>1118</sup> ; +; <i>dTat</i> <sup>KO</sup> / <i>dTat</i> <sup>KO</sup>                                           |
| <i>αTub84B</i> <sup>K40A</sup>         | <i>w</i> <sup>1118</sup> ; +; <i>αTub84B</i> <sup>K40A</sup> / <i>αTub84B</i> <sup>KO</sup>                                   |
| <b>Supplemental Figure S1B</b>         |                                                                                                                               |
| <i>wt</i>                              | <i>w</i> <sup>1118</sup>                                                                                                      |
| <i>Sirt1</i> <sup>KO</sup>             | <i>w</i> <sup>1118</sup> ; <i>Sirt1</i> <sup>2A-7-11</sup>                                                                    |
| <i>Sirt2</i> <sup>KO</sup>             | <i>w</i> <sup>1118</sup> ; <i>Sirt2</i> <sup>5B-2-35</sup>                                                                    |
| <i>HDAC6</i> <sup>KO</sup>             | <i>y</i> <sup>1</sup> , <i>w</i> <sup>1118</sup> , <i>HDAC6</i> <sup>KO</sup>                                                 |
| <b>Supplemental Figure S2a</b>         |                                                                                                                               |
| Larva                                  | <i>w</i> <sup>1118</sup>                                                                                                      |
| Muscle                                 | <i>w</i> <sup>1118</sup> ; <i>MHC-Gal4 / UAS-nls-GFP</i>                                                                      |
| Epi.                                   | <i>w</i> <sup>1118</sup> ; <i>UAS-nls-GFP / + ; A58-Gal4 / +</i>                                                              |
| Glia                                   | <i>w</i> <sup>1118</sup> ; <i>UAS-nls-GFP / + ; repo-Gal4 / +</i>                                                             |
| CNS                                    | <i>w</i> <sup>1118</sup> ; <i>elav-Gal4 / + ; UAS-nls-GFP / +</i>                                                             |
| MNs                                    | <i>w</i> <sup>1118</sup> ; <i>UAS-nls-GFP / + ; Vglut-Gal4 / +</i>                                                            |
| PNS                                    | <i>w</i> <sup>1118</sup> ; <i>elav-Gal4 / + ; UAS-nls-GFP / +</i>                                                             |
| PNS-da                                 | <i>w</i> <sup>1118</sup> ; <i>21-7-Gal4 / UAS-nls-GFP</i>                                                                     |
| <b>Supplemental Figure S2b</b>         |                                                                                                                               |
| <i>αTub84B</i> <sup>K40A</sup>         | <i>w</i> <sup>1118</sup> ; +; <i>αTub84B</i> <sup>K40A</sup> / <i>αTub84B</i> <sup>KO</sup>                                   |
| <b>Supplemental Figure S3</b>          |                                                                                                                               |
| <i>UAS-kat-60</i>                      | <i>w</i> <sup>1118</sup> ; <i>ppk-mCD4-tdTomato, ppk-Gal4 / UAS-kat60</i>                                                     |
| <i>UAS-kat-60 + dTat</i> <sup>KO</sup> | <i>w</i> <sup>1118</sup> ; <i>ppk-mCD4-tdTomato, ppk-Gal4 / UAS-kat60; dTat</i> <sup>KO</sup> / <i>dTat</i> <sup>KO</sup>     |
| <b>Supplemental Figure S4</b>          |                                                                                                                               |
| <i>nompC</i> <sup>1/3</sup>            | <i>w</i> <sup>1118</sup> ; <i>nompC</i> <sup>1</sup> / <i>nompC</i> <sup>3</sup>                                              |
| <i>c3da&gt;TnT</i>                     | <i>w</i> <sup>1118</sup> ; <i>nompC-Gal4 / UAS-Tetanus Toxin</i>                                                              |

**Table S4. Related to all figures. Oligonucleotide primers used in this study.**

| Primers used to generate dsRNAs.          |                                                              |
|-------------------------------------------|--------------------------------------------------------------|
| T7-GCN5-f                                 | TAATACGACTCACTATAGGTGAGAATTTGGATGACCTGCCTGCGGATGTAGTAATGCGCG |
| T7-GCN5-r                                 | TAATACGACTCACTATAGGCAGCTATGAACTGCGTGTTACAATGCTTGGATGCAGC     |
| T7-NAT10-f                                | TAATACGACTCACTATAGGTCATGGCAAAAAGCGAGCAAAGAAGATTGCTGTGGGC     |
| T7-NAT10-r                                | TAATACGACTCACTATAGGATTCCTGGCTCCACGTTGATGGTCTTGGAGCTAAGTGGC   |
| T7-ELP3-f                                 | TAATACGACTCACTATAGGTTCCGGCGTGGAACACGGAAATCTCCGTGAACTGGCGC    |
| T7-ELP3-r                                 | TAATACGACTCACTATAGGCTATATATTAATGTATATATTTAAGAGAGTAGTTTTAAG   |
| T7-ARD1-f                                 | TAATACGACTCACTATAGGATGAACATCCGCTGCGCAAAACCGGAAGACCTAATGACC   |
| T7-ARD1-r                                 | TAATACGACTCACTATAGGTCAGCAACAATGGCCATCGTGACCGCTGTGGTTGTGCG    |
| T7-Nat1-f                                 | TAATACGACTCACTATAGGATGCCTTCTAGCGATCCCCTGCCGCCAAGGAGGGCGCGC   |
| T7-Nat1-r                                 | TAATACGACTCACTATAGGGGCCCTGGTATTTGGTCAGGTGGTCCACGGCCTGCTGC    |
| T7-CG3967/dTAT-f                          | TAATACGACTCACTATAGGATGGTGGAAATCCGCTTCGATATTAAGCCGCTGTTCCGCGC |
| T7-CG3967/dTAT-r                          | TAATACGACTCACTATAGGGCACGAAATTGTTTCGCTTGCAGGATGATTGCTTTAATCC  |
| T7-CG17003-f                              | TAATACGACTCACTATAGGATGGTGGAGTTGCGCTTTGACATTAAGCACCTCTTTCCGC  |
| T7-CG17003-r                              | TAATACGACTCACTATAGGCCCTGCGGAATGGTGCAGGACCAGGCCATAGTGTTTGGC   |
| T7-CAT-control-f                          | TAATACGACTCACTATAGGATCCCAATGGCATCGTAAAGAACATTTTGGAGGC        |
| T7-CAT-control-r                          | TAATACGACTCACTATAGGGGGCGAAGAAGTTGTCCATATTGGCCAGG             |
| T7-Sirt2-fwd                              | TAATACGACTCACTATAGGATGGATAAGGTTGACGCTTCTTTGCAAACTACTACATC    |
| T7-Sirt2-rev                              | TAATACGACTCACTATAGGCCATGTCGTA CTCTTGCAGGCACTTAATGC           |
| T7-HDAC6-f                                | TAATACGACTCACTATAGGATACAGTGCCTGCGATTGCTG                     |
| T7-HDAC6-r                                | TAATACGACTCACTATAGGCTTGGGATTGGACTCGAAAA                      |
| Primers used to generate recombinant dTAT |                                                              |
| Bam-dTATalt                               | CCTATAGGATCCATGGTAGAGTTTTGCTTTGACATAAAACCCCTATTTGCTCAACC     |
| dTATalt-196-Not                           | GGTATAGCGGCCGCTCACCCATTGCCTCCCCCGTTCCGGACTCTCCGTCATTGAAAAAC  |
| NheI-dTAT                                 | GGTATAGCTAGCTATAATGGTGGAAATCCGCTTCGATATTAAG                  |
| dTAT-196-XhoI                             | GGTATACTCGAGATTCGCCGATTCCCATCGTTAAAGAATCCCTCGTAGAGCACGAAATT  |

| Primers used to generate UAS-GFP-dTat constructs           |                                                            |
|------------------------------------------------------------|------------------------------------------------------------|
| KpnI-eGFP                                                  | CCTATAGGTACCATGGTGAGCAAGGGCGAGGAGCTGTTCACCGGGG<br>TGGTGCCC |
| EcoRI-eGFP                                                 | CCTATAGGTACCATGGTGAGCAAGGGCGAGGAGCTGTTCACCGGGG<br>TGGTGCCC |
| GFP-dTATalt-s                                              | CCTATAGGTACCATGGTGAGCAAGGGCGAGGAGCTGTTCACCGGGG<br>TGGTGCCC |
| GFP-dTATalt-as                                             | CCTATAGGTACCATGGTGAGCAAGGGCGAGGAGCTGTTCACCGGGG<br>TGGTGCCC |
| dTATalt-L-Apa                                              | CCTATAGGTACCATGGTGAGCAAGGGCGAGGAGCTGTTCACCGGGG<br>TGGTGCCC |
| dTATalt-S-Apal                                             | CCTATAGGTACCATGGTGAGCAAGGGCGAGGAGCTGTTCACCGGGG<br>TGGTGCCC |
| dTATalt-L-NotI                                             | CCTATAGGTACCATGGTGAGCAAGGGCGAGGAGCTGTTCACCGGGG<br>TGGTGCCC |
| dTATalt-S-NotI                                             | CCTATAGGTACCATGGTGAGCAAGGGCGAGGAGCTGTTCACCGGGG<br>TGGTGCCC |
| dTatalt-G133W-G135-<br>W-sense                             | CCTATAGGTACCATGGTGAGCAAGGGCGAGGAGCTGTTCACCGGGG<br>TGGTGCCC |
| dTatalt-G133W-G135-<br>W-asense                            | CCTATAGGTACCATGGTGAGCAAGGGCGAGGAGCTGTTCACCGGGG<br>TGGTGCCC |
| Primers used for dTat-KO gRNA expression constructs.       |                                                            |
| gRNA1F                                                     | CTTCAAGAACAATCGGGGTGCAGC                                   |
| gRNA1R                                                     | AAACGCTGCACCCCGATTGTTCTT                                   |
| gRNA2F                                                     | CTTCGAGCAGCGGATTGGGAGCAC                                   |
| gRNA2R                                                     | AAACGTGCTCCCAATCCGCTGCTC                                   |
| Primers used for constructing the dTat-KO repair template. |                                                            |
| dTatGFP gRNA1 S                                            | CTTCGGGGTCCAAAAGAACAATCG                                   |
| dTatGFP gRNA1 AS                                           | AAACCGATTGTTCTTTTGGACCCC                                   |
| dTatGFP gRNA2 S                                            | CTTCGCAAGAGGTATATTTCTACT                                   |
| dTatGFP gRNA2 AS                                           | AAACAGTAGGAAATATACCTCTTGC                                  |
| Primers used for GFP-dTat gRNA expression constructs.      |                                                            |
| dTatGFP gRNA1 S                                            | CTTCGGGGTCCAAAAGAACAATCG                                   |
| dTatGFP gRNA1 AS                                           | AAACCGATTGTTCTTTTGGACCCC                                   |
| dTatGFP gRNA2 S                                            | CTTCGCAAGAGGTATATTTCTACT                                   |
| dTatGFP gRNA2 AS                                           | AAACAGTAGGAAATATACCTCTTGC                                  |
| Primers used for constructing the GFP-dTat repair template |                                                            |
| dTatGFP 5'arm F                                            | CCCTTCGCTGAAGCAGGTGGGGTTGTGCGACTACCACTC                    |
| dTatGFP 5'arm R                                            | CTCCTTTACTCATTATGCTGCATCCCGATTG                            |
| dTatGFP GFP F                                              | GGGATGCAGCATAATGAGTAAAGGAGAAGAACTTTTC                      |
| dTatGFP GFP R                                              | GGAATTCACCATTTTGTATAGTTCATCCATGC                           |
| dTatGFP start F                                            | TGAACTATACAAAATGGTGGAAATCCGCTTC                            |
| dTatGFP start R                                            | ATGTCCGCGGCCGCTAGCATGCAAGCATTACTTACTTGTGACCCGC             |
| dTatGFP 3'arm F                                            | TAGGCCTTCTGCAGCGCAAGTAGGAAATATACCTC                        |
| dTatGFP 3'arm R                                            | GATTGACGGAAGAGCCTCATTGGTTAACAGTTAGC                        |
